# Supplementary material for: Local angiogenic interplay of Vegfc/d and Vegfa controls brain region-specific emergence of fenestrated capillaries
Source: eLife journal article supplement (doi:10.7554/elife.86066), 2023-05-16
Supplement: supp [file elife-86066-supp-v1.zip]

Archive with 6 entries (6 files):
- elife_poa_e86066_Video_1.mov
- elife_poa_e86066_Figure_9_source_data_1.xlsx
- elife_poa_e86066_Figure_10_source_data_1.xlsx
- elife_poa_e86066_Figure_1_figure_supplement_1.pdf
- elife_poa_e86066_Figure_1_figure_supplement_2.pdf
- elife_poa_e86066_Figure_6_figure_supplement_1.pdf
