# Supplementary material for: Local angiogenic interplay of Vegfc/d and Vegfa controls brain region-specific emergence of fenestrated capillaries
Source: eLife journal article supplement (doi:10.7554/elife.86066), 2023-05-16
Supplement: supp [file elife-86066-supp-v1.zip › elife_poa_e86066_Figure_9_source_data_1.xlsx]

## Sheet: Sheet1
	Analysis of 6 dpf larvae of indicated genotype
	The number of endothelial cells that comprised the CVP is presented.
	6 dpf	Genotype
	Larva No.	WT	gpr124-/-	reck-/-	wnt7aa-/-
	1	83	68	98	103
	2	102	80	113	103
	3	98	74	86	89
	4	72	78	84	86
	5	91	87	100	108
	6	97	81	105	90
	7	100	65	74	100
	8	88	85	83	107
	9	118	109	85	76
	10	104	107	123	85
	11	115	143		78
	12	110	104
	13	135	120
	14	120	121
	15	145	115
	16		133
	n	15	16	10	11
	mean	105.2	98.125	95.1	93.1818
	SD	19.3176	24.0246	15.38	11.4962
