# Supplementary material for: Local angiogenic interplay of Vegfc/d and Vegfa controls brain region-specific emergence of fenestrated capillaries
Source: eLife journal article supplement (doi:10.7554/elife.86066), 2023-05-16
Supplement: supp [file elife-86066-supp-v1.zip › elife_poa_e86066_Figure_10_source_data_1.xlsx]

## Sheet: Sheet1
	Analysis of 6 dpf larvae of indicated genotype
	The number of endothelial cells that comprised the CVP is presented.
	6 dpf	Genotype
	Larva No.	WT	vegfab-/-	vegfd -/-	vegfc -/-	vegfab-/-;vegfd-/-	vegfc-/-;vegfd-/-	vegfab-/-;vegfc-/-	vegfab-/-;vegfc-/-;vegfd-/-
	1	107	33	73	93	61	50	48	39
	2	123	49	87	139	58	76	57	41
	3	125	35	75	129	44	24	43	50
	4	83	27	84	124	24	92	57	64
	5	71	28	139	94	40	103	48	68
	6	125	42	64	99	24	96	60	29
	7	97	38	74	55	50	84	62	68
	8	106	34	52	109	33	78	70	70
	9	102	18	58	69	30	79	33	36
	10	81	33	94	61	56	84	43	44
	11	110	43	61	66	46	71	28	49
	12	105	81	62	69	31	87	39	29
	13		93	65	72	81	81	42	26
	14		61				107		40
	15		65				75		53
	16		88				95		31
	17		77				86		39
	18		69				92		61
	19		88				69
	20		90				85
	21						81
	22						78
	23						81
	24						88
	25						102
	26						79
	27						59
	28						48
	29						61
	30						66
	n	12	20	13	13	13	30	13	18
	mean	102.917	54.6	76	90.6923	44.4615	78.5667	48.4615	46.5
	SD	17.5575	24.7777	22.5056	27.9684	16.6764	17.5866	12.1629	14.6096
