# Supplementary figures and images for: Local angiogenic interplay of Vegfc/d and Vegfa controls brain region-specific emergence of fenestrated capillaries
Source: eLife journal article supplement (doi:10.7554/elife.86066), 2023-05-16

Figure 1 – figure supplement 1

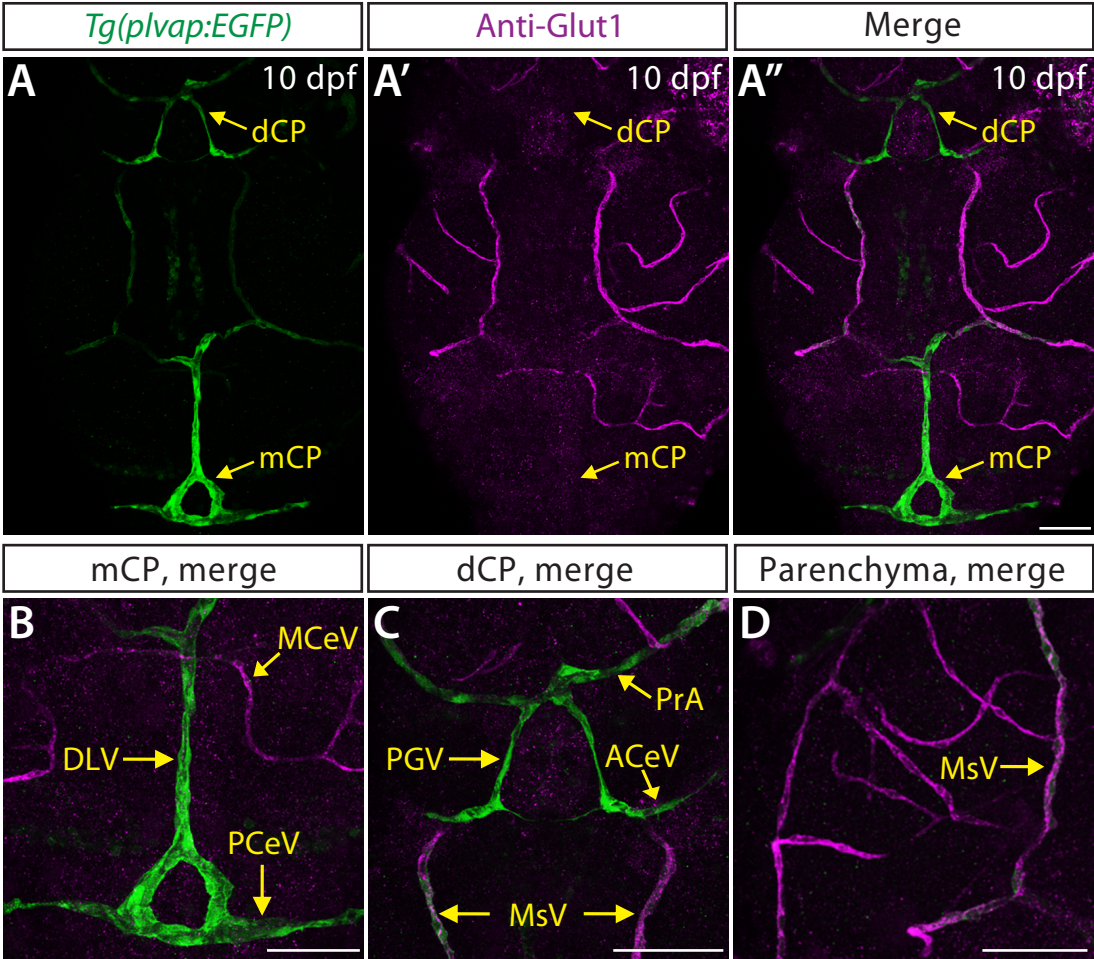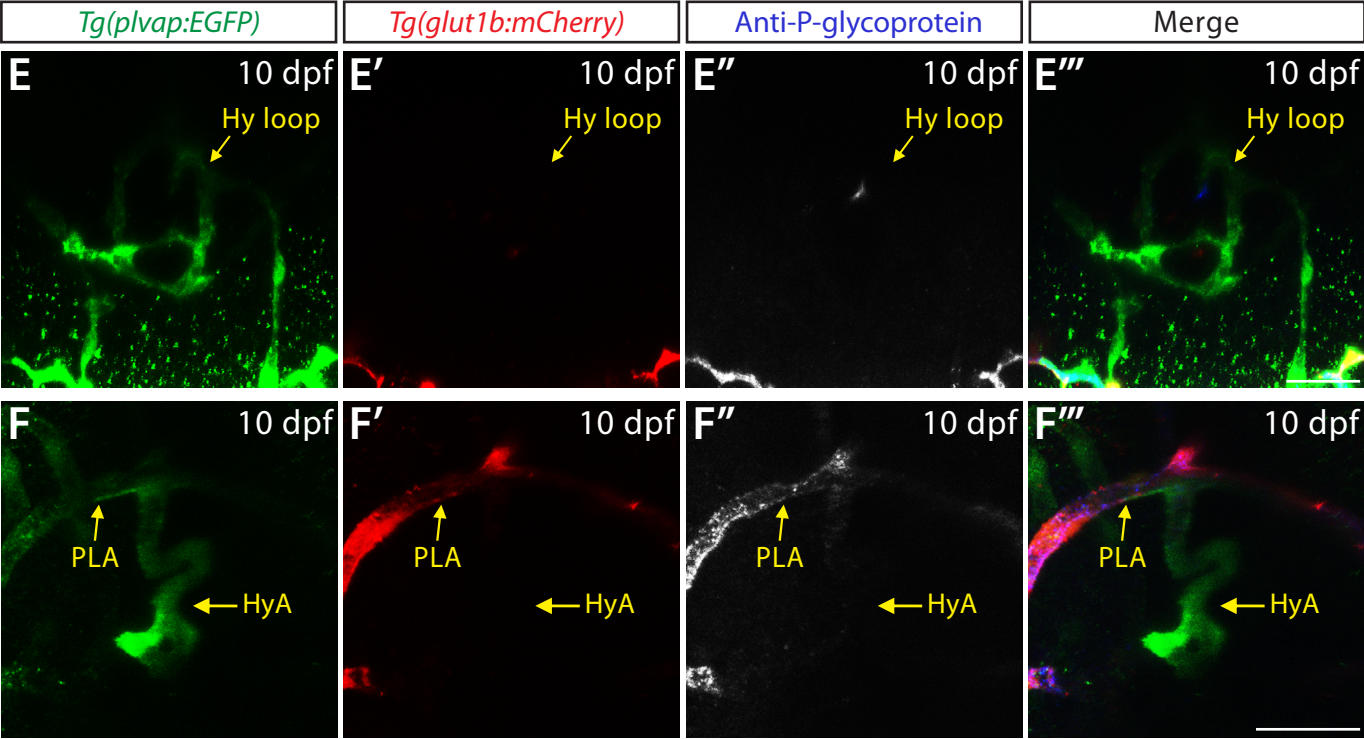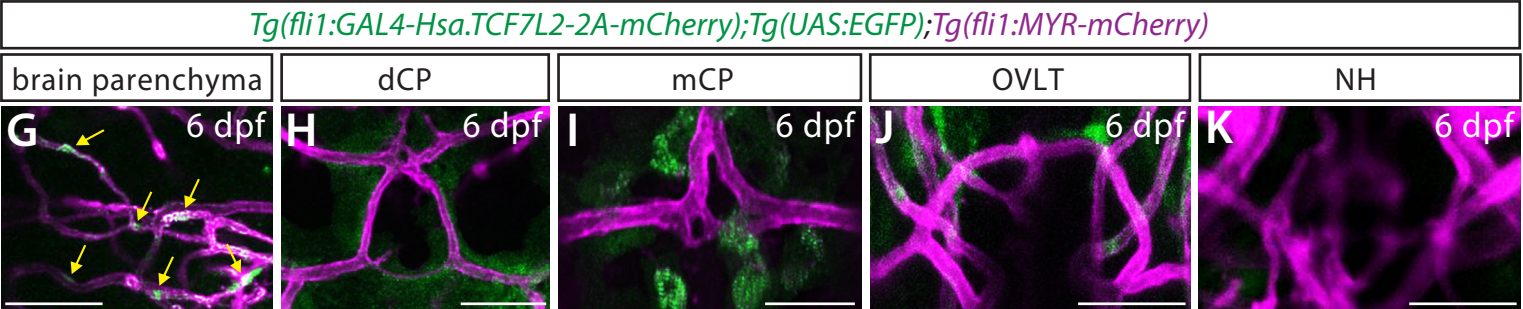

Supplement: supp [file elife-86066-supp-v1.zip › elife_poa_e86066_Figure_1_figure_supplement_1.pdf]

Figure 1 – figure supplement 2

A

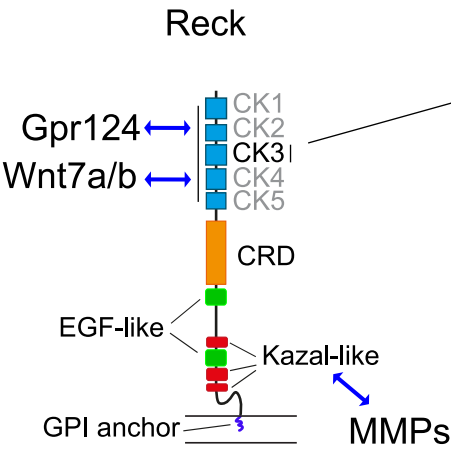

B

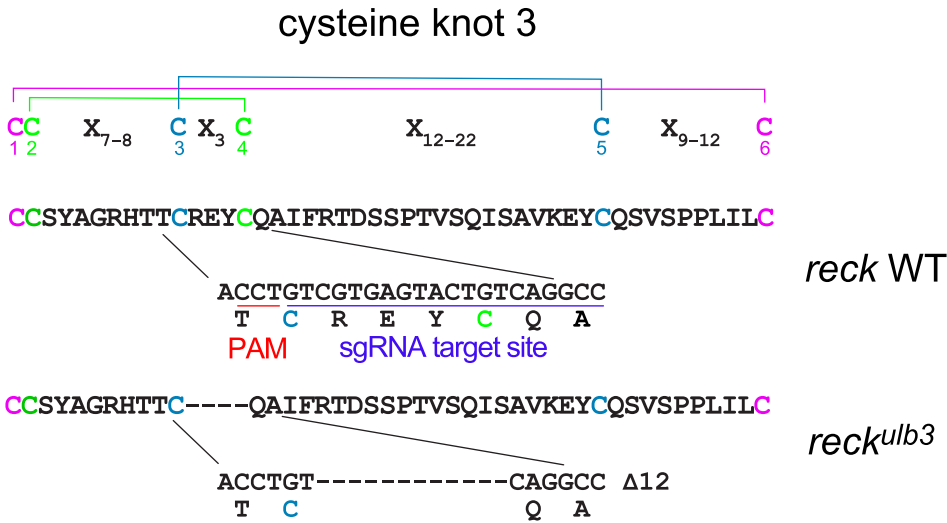

Supplement: supp [file elife-86066-supp-v1.zip › elife_poa_e86066_Figure_1_figure_supplement_2.pdf]

Figure 6 – figure supplement 1

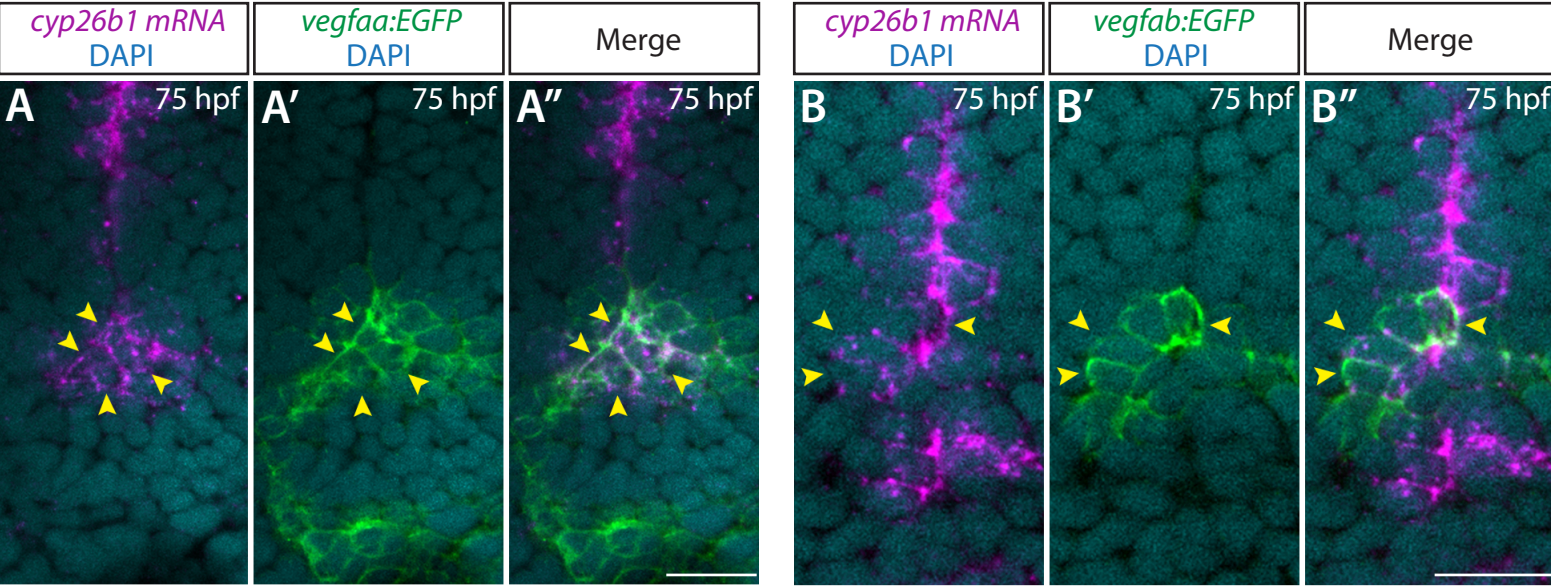

Supplement: supp [file elife-86066-supp-v1.zip › elife_poa_e86066_Figure_6_figure_supplement_1.pdf]
